# Supplementary material for: Using FTIR-ATR, analytical colour and mercury for unravelling the cremation ritual of Tyresta Viking Age burial mound (South-Central Sweden)
Source: Research Square preprint supplement (doi:10.21203/rs.3.rs-7273566/v1), 2025-10-01
Supplement: Supplementary file 1 [file 788609ed0eb3c8ec56195be5.docx]

**Supplementary Table 1** Identified species in different context of the Tyresta mound, NISP. Not all unidentified fragments were counted

| **Art** | **Filling** | **Secondary burial 1** | **Secondary burial 2** | **Badger layer** | **Badger layer, tunnels** | **Central cairn** | **Cremation layer** | **Urns (2)** | **Cremation layer, bottom** | **Central cairn, ring stones** | **Excavation square, bottom of cremation layer** | **Stray find** | **Total** |
| --- | --- | --- | --- | --- | --- | --- | --- | --- | --- | --- | --- | --- | --- |
| Human |  |  |  | 46 |  | 35 | 121 | 8 | 1 | 25 | 16 |  | 252 |
| Human? |  |  |  | 1 |  | 1 |  |  |  |  | 2 |  | 4 |
| Horse |  |  |  | 2 | 3 | 7 | 49 |  | 2 | 7 | 4 |  | 74 |
| Large mammal |  |  |  | 4 | 7 | 22 | 98 |  | 11 | 50 | 7 | 1 | 200 |
| Sheep/goat |  |  |  |  |  | 3 | 4 |  |  |  |  |  | 7 |
| Dog |  | 3 |  | 10 |  | 28 | 179 |  | 4 | 13 | 10 |  | 247 |
| Dog? |  |  |  |  |  |  | 1 |  |  |  |  |  | 1 |
| Middle sized mam. |  |  | 3 | 32 | 6 | 19 | 155 |  | 12 | 51 | 47 | 1 | 326 |
| Cat |  |  |  | 2 | 1 | 2 | 28 |  |  | 1 | 1 |  | 35 |
| Small mam. |  | 2 | 3 | 20 | 1 | 2 | 76 |  | 9 | 5 | 34 | 4 | 156 |
| Mammal | 1 | 16 | 20 | 100 | 38 | 544 | 1358 | 6 | 33 | 141 | 251 | 47 | 2555 |
| Goose |  |  |  |  |  |  | 1 |  |  |  |  |  | 1 |
| Galliformes |  |  |  |  |  | 1 |  |  |  |  |  |  | 1 |
| Bird |  |  |  |  |  |  | 14 |  |  |  |  |  | 14 |
| Bird? |  |  |  |  |  |  |  |  |  |  | 3 | 2 | 5 |
| Fish |  |  |  |  |  |  | 1 |  |  |  |  |  | 1 |
| Indeterminate* |  | 2 | 1 | 14 |  | 70 | 86 |  | 37 | 41 | 139 |  | 390 |
| **Total** | **1** | **23** | **27** | **231** | **56** | **734** | **2171** | **14** | **109** | **334** | **514** | **55** | **4269** |

**
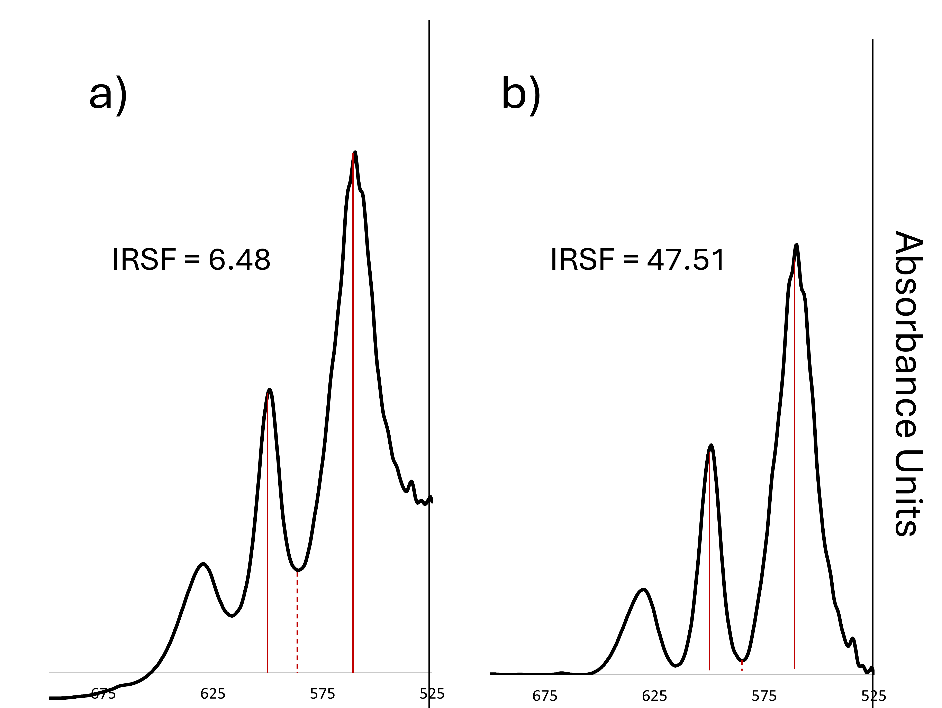
**

**Supplementary fig 1** Effect of baseline correction in the IRSF index. a) raw spectrum of sample Tyr012 in the 700-525 cm-1 absorbance range; b) rubber-band baseline corrected spectrum of sample Tyr012 in the same absorbance range

**Supplementary Table 2** CIELab parameters for the cortical bone sampled for Hg analysis

| **Sample** | **L*** | **a*** | **b*** | **C*** | **h** |
| --- | --- | --- | --- | --- | --- |
| **aTyr002** | 82.02 | 0.98 | 7.12 | 7.19 | 82.2 |
| **Tyr018** | 83.56 | 0.47 | 3.01 | 3.05 | 81.21 |
| **Tyr025** | 76.48 | 0.96 | 6.67 | 6.74 | 81.8 |
| **Tyr026** | 81.16 | 0.98 | 6.33 | 6.41 | 81.18 |
| **Tyr032** | 81.96 | 0.96 | 6.29 | 6.36 | 81.35 |
| **Tyr033** | 81.24 | 0.99 | 6.84 | 6.91 | 81.75 |
| **Tyr035** | 82.09 | 0.88 | 6.21 | 6.27 | 81.93 |
| **Tyr042** | 73.74 | 0.62 | 4.63 | 4.67 | 82.42 |
| **Tyr044** | 81.16 | 1.05 | 6.76 | 6.84 | 81.15 |
| **Tyr054** | 71.54 | 0.78 | 4.51 | 4.57 | 80.19 |
| **Tyr055** | 77.05 | 0.62 | 4.93 | 4.96 | 82.87 |
| **Tyr059** | 82.28 | 0.28 | 4.7 | 4.71 | 86.59 |
| **Tyr066** | 83.67 | 0.84 | 6.26 | 6.32 | 82.34 |
| **Tyr068** | 67.63 | 0.87 | 3.99 | 4.08 | 77.74 |
| **Tyr087** | 81.62 | 1.33 | 8.91 | 9.01 | 81.5 |
| **bTyr091** | 62.81 | 5.28 | 19.26 | 19.97 | 74.67 |
| **Tyr092** | 64.39 | 5.66 | 18.93 | 19.76 | 73.34 |
| **Tyr102** | 61.9 | 5.27 | 18.21 | 18.96 | 73.87 |
| **Tyr105** | 59.49 | 5.09 | 16.43 | 17.2 | 72.78 |
| **Tyr107** | 63.14 | 4.92 | 17.1 | 17.8 | 73.96 |
| **Tyr109** | 25.08 | 2.26 | 5.25 | 5.71 | 66.73 |

aUpper table: calcined samples; blower table: not-calcined samples

**Supplementary text 1** In the figure (Supplementary figure 2) we see both classification methods produce similar spectroscopic features for each grade, but the classification made by the discrimination analysis shows less variation among samples. The main features of each grade are:

- Grade 0 (n=13): the spectra present the spectra characteristic of bone with an intense phosphate peak at ~1015 cm-1, the characteristic ν4 phosphate doublet at 598 and 560 cm-1carbonate peaks between 1490 and 1380 cm-1, and amide A and B (3500-3020 cm-1), I (1690-1590 cm-1), and II (1585-1500 cm-1). Shoulders at ~1088 and ~961 cm-1 are shown.
- Grade 1 (n=0): no spectrum was classified as this grade of burning.
- Grade 2 (n=2): absorbance at amide A, B, I and II is less intense. Peak at 961 cm-1 is more defined.
- Grade 3 (n=4): no apparent differences were shown regarding grade 2.
- Grade 4 (n=7): absorbance in the amide regions is less intense and disappears in some samples. A peak at ~631 cm-1 appears. Peak at ~961 cm-1 becomes sharper, and peak at ~1088 cm-1 is no longer a shoulder, but a well-defined peak. In some samples peaks at ~3570, ~2012 and ~698 cm-1 are observable. The valley between 598 and 560 cm-1 becomes observably deeper. Peaks at 1490-1390 cm-1 and 872 cm-1 are less intense.
- Grade 5 (n=11): absorbance at amide regions is almost imperceptible for most samples. Peaks at 1088 and 961 cm-1 become sharper. Peak at 872 cm-1 loses intensity. Peak at 631cm-1 is more intense. Peaks at 3570, 2012 and 698 cm-1 are present in some samples. Peaks at 1490-1390 cm-1 are less intense.
- Grade 6A (n=37) and 6B (n=33) : more samples present the cyanamide band at 2012 cm-1, which is more intense. Peaks at ~1088 and ~961 cm-1 are sharper. Peaks at 1490-1390 and ~872 cm-1 are less intense. No amide absorption is observable. The ν4 phosphate valley is deeper. Peaks at ~3570, and ~698 cm-1 are present in some samples.


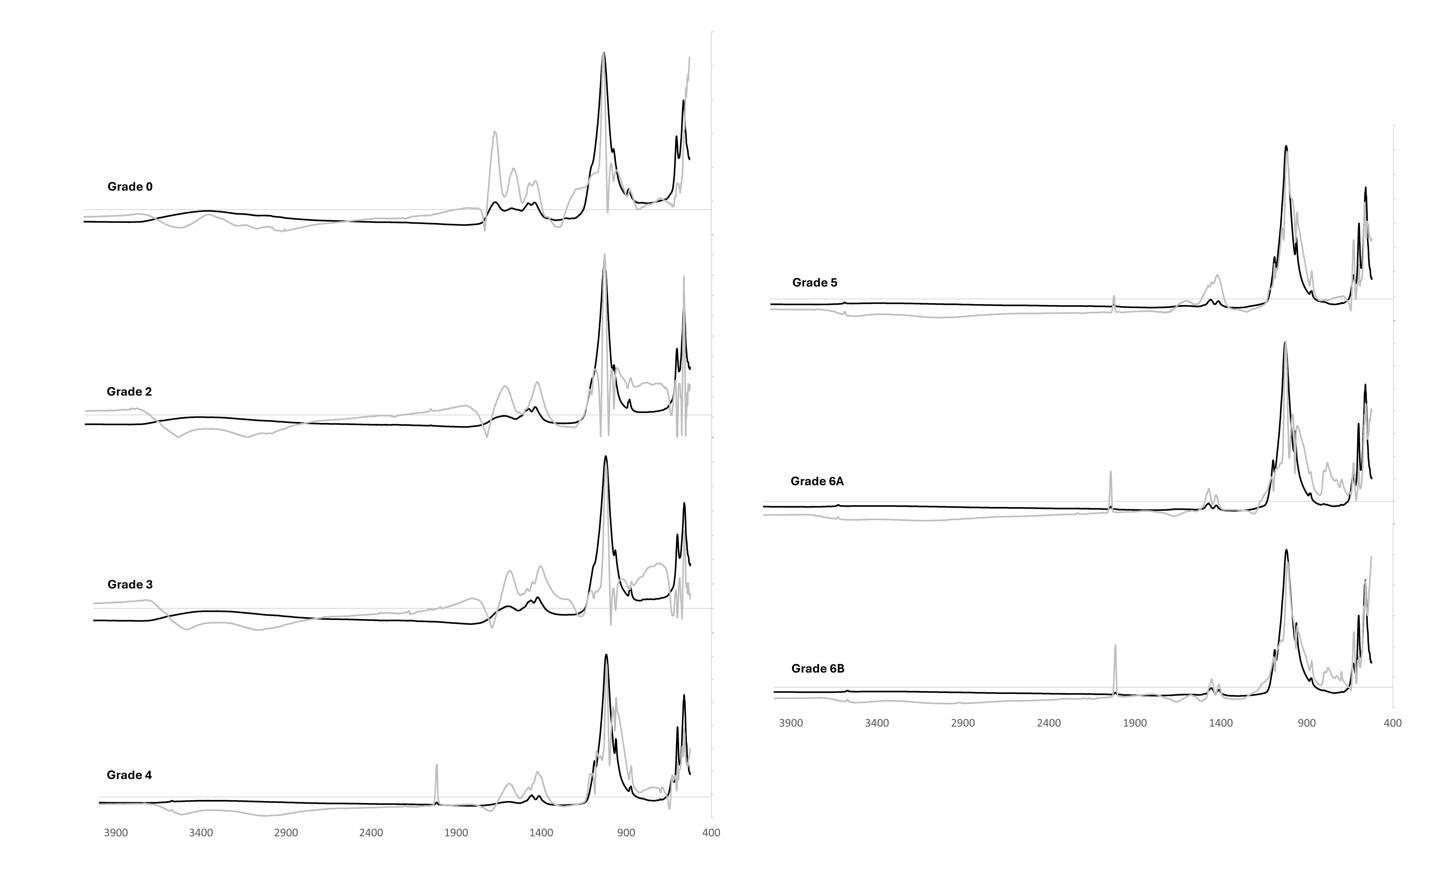


**Supplementary fig 2** Average and standard deviation spectra for the samples classified by m-Stiner

**Suplementary table 3** Pearson correlation coefficient for the IR absorbance bands and the CIELab parameters for the burnt group

| **WN (cm-1)** | **L*** | **a*** | **b*** | **C*** | **h** |
| --- | --- | --- | --- | --- | --- |
| **557** | -0.439 |  | -0.394 | -0.385 | -0.673 |
| **571** | 0.350 |  | 0.332 | 0.326 | **0.511** |
| **598** | -0.471 | -0.418 |  |  | 0.376 |
| **602** |  | -0.433 |  |  | 0.672 |
| **616** |  | 0.417 | **0.627** | **0.624** |  |
| **650** | -0.487 | -0.326 |  |  | 0.340 |
| **693** | **-0.610** |  |  |  |  |
| **698** | -0.459 | -0.503 | -0.453 | -0.456 |  |
| **717** |  |  | **0.505** | **0.502** |  |
| **739** | -0.3373 | 0.316 | 0.478 | 0.475 |  |
| **754** |  |  | 0.447 | 0.442 | 0.304 |
| **872** |  |  | 0.345 | 0.338 | **0.519** |
| **961** |  | -0.469 | -0.302 | -0.307 | 0.364 |
| **965** |  | -0.326 |  |  | 0.471 |
| **1014** |  |  |  |  | **-0.530** |
| **1037** |  |  | 0.302 |  | **0.526** |
| **1075** | 0.353 |  | 0.472 | 0.465 | **0.583** |
| **1086** |  | -0.369 |  |  | 0.494 |
| **1123** |  | **0.600** | **0.827** | **0.825** |  |
| **1147** |  | **0.766** | **0.652** | **0.657** | -0.369 |
| **1196** |  | **0.511** |  | 0.300 | -0.484 |
| **1381** |  | **0.533** | **0.678** | **0.678** |  |
| **1413** | 0.394 | 0.375 | **0.638** | **0.636** |  |
| **1432** | 0.323 | 0.471 | **0.645** | **0.644** |  |
| **1453** | 0.470 | 0.326 | **0.595** | **0.592** | 0.311 |
| **1460** | 0.447 |  | **0.583** | **0.580** | 0.352 |
| **1498** |  | 0.481 | **0.674** | **0.672** |  |
| **1500** |  | 0.483 | **0.674** | **0.673** |  |
| **1529** |  | **0.605** | **0.563** | **0.567** |  |
| **1560** |  | 0.400 |  |  | -0.447 |
| **1621** | -0.309 | 0.341 |  |  | -0.402 |
| **2001** | **-0.601** | -0.389 | **-0.646** | **-0.644** | -0.315 |
| **2010** | -0.434 | **-0.563** | **-0.583** | **-0.585** |  |
| **2028** | **-0.630** | -0.437 | **-0.685** | **-0.682** |  |
| **2855** |  |  | -0.325 | -0.319 | -0.406 |
| **2918** |  |  | -0.313 | -0.308 | -0.347 |
| **3248** |  |  | -0.33 | -0.326 | -0.397 |
| **3562** |  |  | -0.441 | -0.435 | -0.421 |


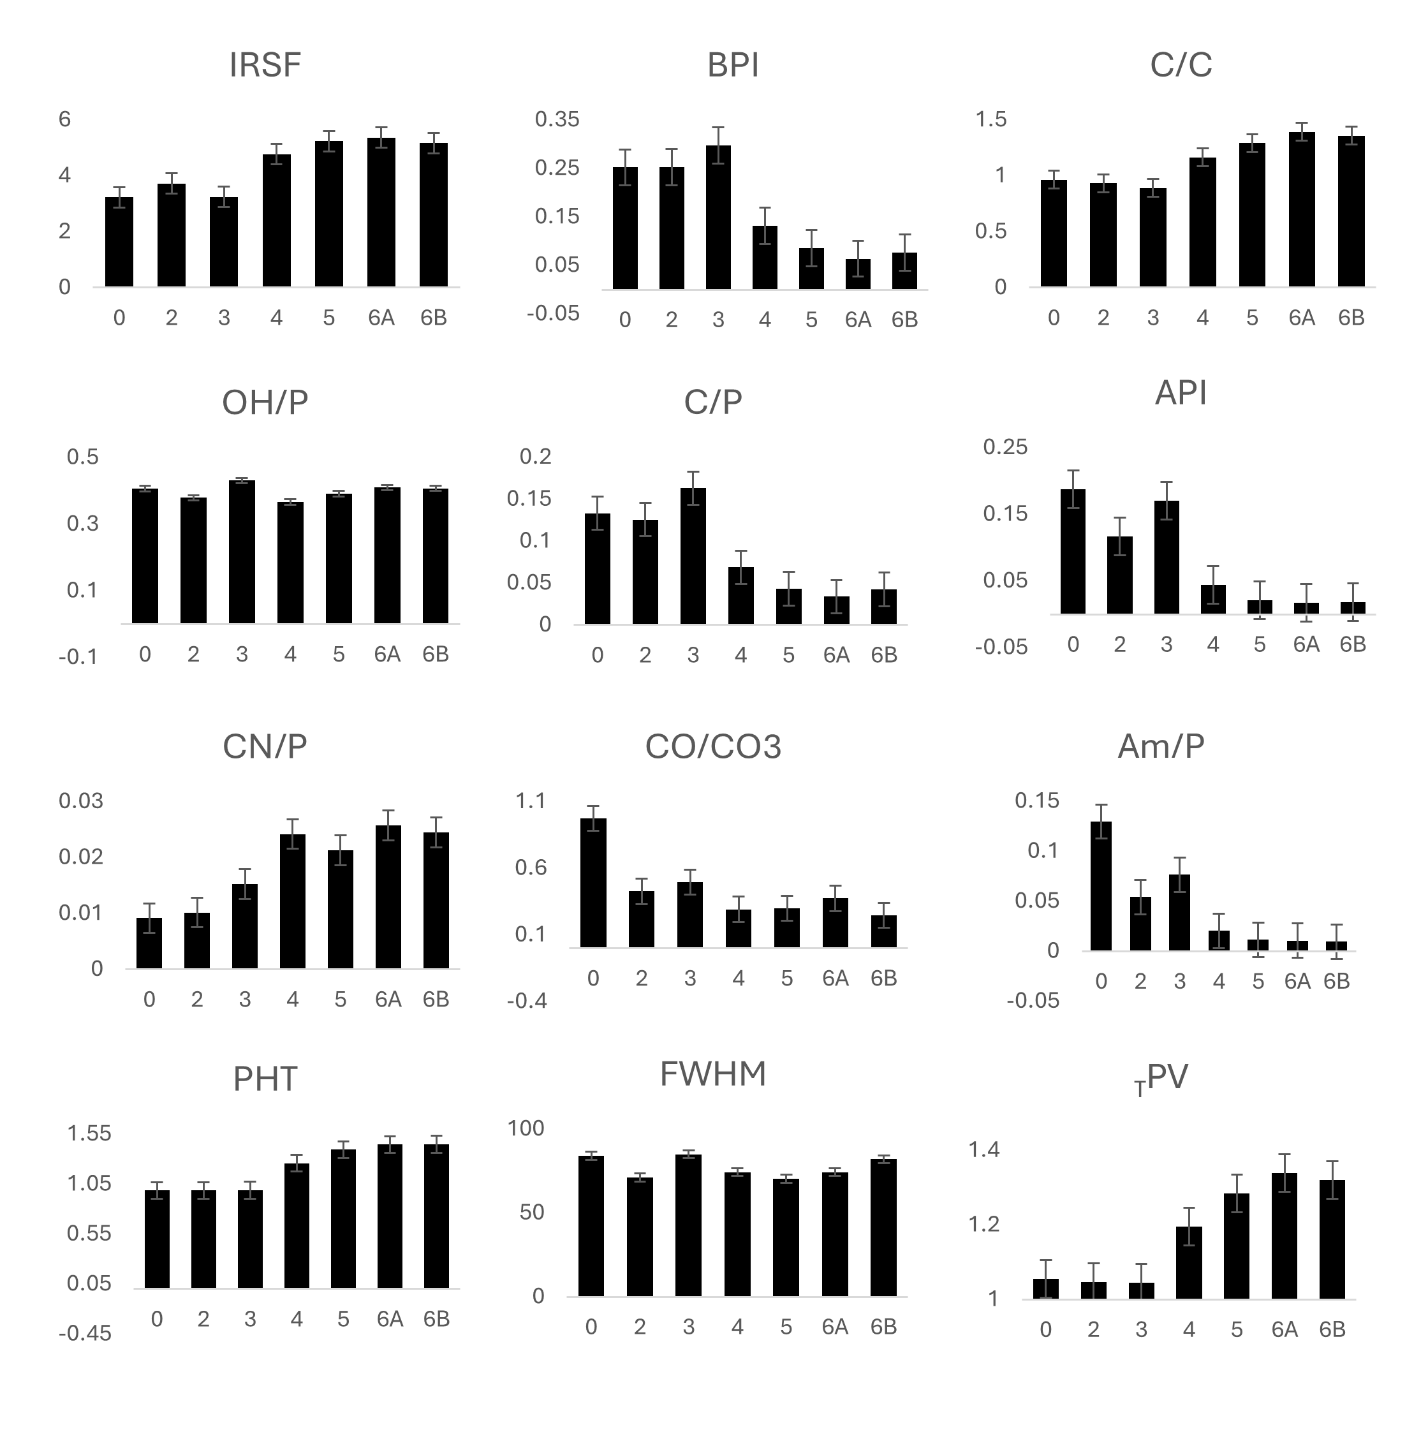


**Supplementary fig 3** Values for the MIR-indices classified by m-Stiner degree of burning

**Supplementary table 4** Loadings for the selected bands for the global PCA

| **Band assignation** | **WN (cm-1)** | **PC1** | **PC2** | **PC3** | **PC4** | **PC5** |
| --- | --- | --- | --- | --- | --- | --- |
| ν3 CO32−/Amide II | 1505 | a**0.934** | 0.265 | 0.099 | 0.127 | 0.095 |
| ν3 CO32− | 1417 | **0.933** | 0.168 | 0.08 | 0.203 | -0.147 |
| Amide I | 1617 | **0.926** | 0.121 | 0.116 | 0.001 | 0.292 |
| Amide II | 1560 | **0.921** | 0.17 | 0.138 | 0.032 | 0.286 |
|  | 667 | **0.901** | -0.164 | 0.028 | -0.264 | 0.193 |
| ν3 CO32− | 1456 | **0.820** | 0.191 | 0.040 | b0.373 | -0.301 |
| ν2 CO32− | 872 | **0.784** | -0.51 | -0.126 | 0.209 | -0.186 |
| Cyanamide | 2012 | **-0.597** | 0.322 | -0.569 | -0.194 | 0.189 |
| OH (lib) | 630 | **-0.672** | -0.331 | 0.504 | 0.235 | 0.195 |
| ν1PO43- | 962 | **-0.676** | -0.483 | -0.366 | 0.312 | 0.109 |
| ν4PO43- | 560 | **-0.703** | 0.489 | 0.227 | 0.204 | 0.138 |
| ν4PO43- | 599 | **-0.754** | 0.105 | 0.141 | 0.524 | 0.13 |
| νOH | 3571 | **-0.972** | 0.035 | 0.064 | 0.031 | -0.121 |
| ν3PO43- | 1023 | -0.541 | **0.643** | 0.274 | -0.266 | -0.215 |
| Phosphate | 1086 | -0.284 | **-0.588** | 0.468 | -0.382 | -0.046 |

aBold type= loadins>0.7 and <-0.7. bRed = loadings from 0.3 to 0.69 and -0.3 to -0.7.

**
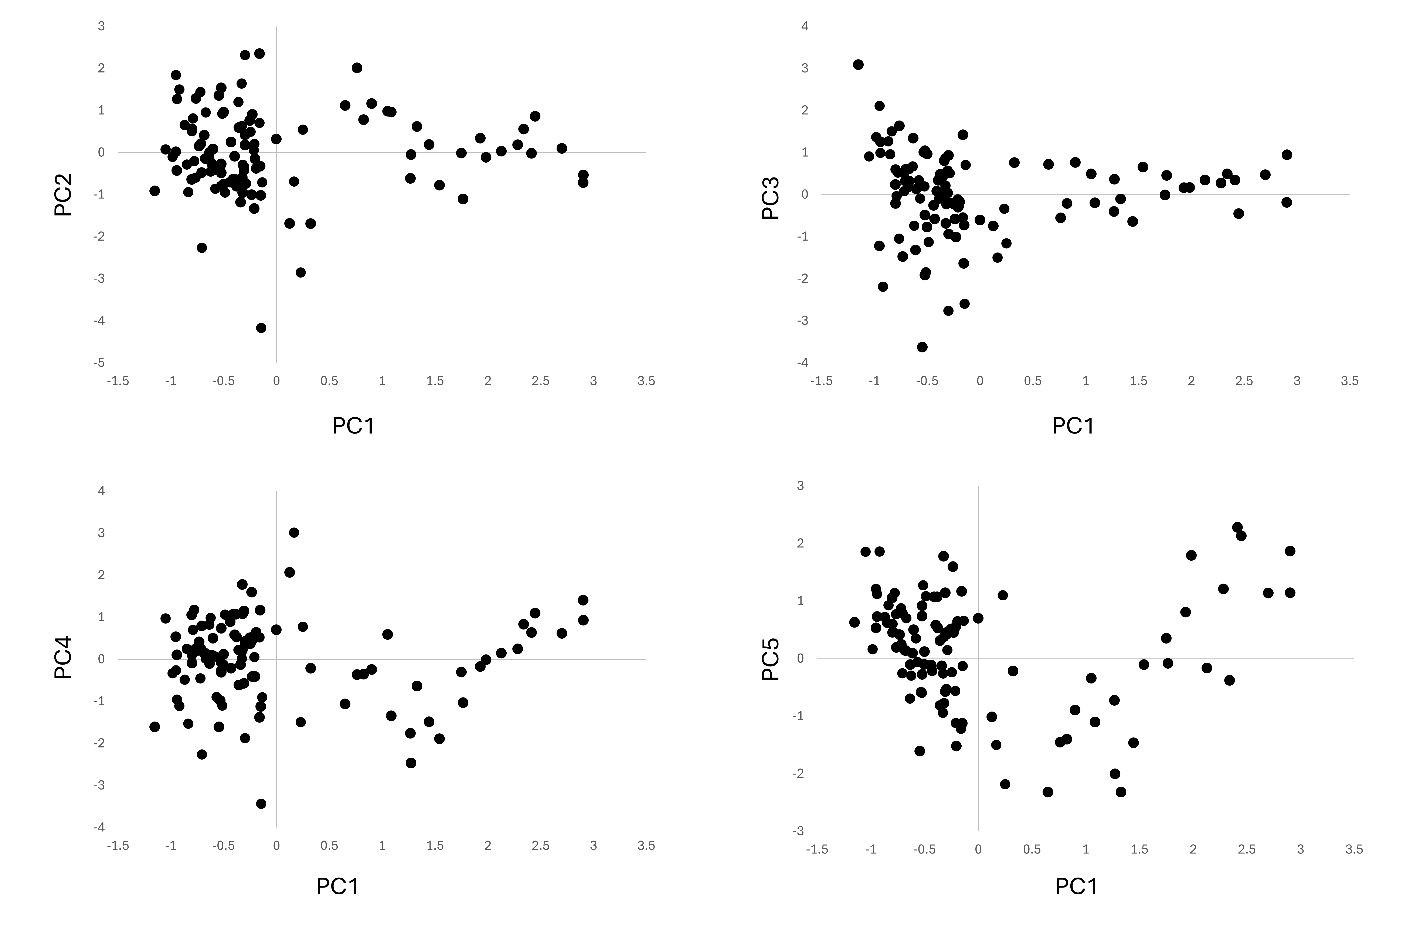
**

**Supplementary fig 4** Scores for the 5 PCs extracted in the global PCA

**Supplementary table 5** Loadings for the selected bands for the PCA of the *non-calcined* group

| **Band assignation** | **WN (cm-1)** | **PC1** | **PC2** | **PC3** | **PC4** |
| --- | --- | --- | --- | --- | --- |
| Amide I | 1652 | a**0.888** | 0.257 | -0.121 | -0.084 |
| Amide A/OH | 3270 | **0.884** | b0.326 | -0.172 | -0.149 |
| ν1PO43- | 961 | **0.810** | 0.029 | 0.343 | 0.269 |
| Amide II | 1558 | **0.692** | 0.662 | 0.007 | 0.097 |
| ν2 CO32− | 872 | **0.681** | 0.603 | 0.323 | -0.123 |
| ν3PO43- | 1015 | **-0.809** | -0.468 | -0.168 | 0.106 |
| ν3 CO32− | 1417 | 0.161 | **0.962** | 0.041 | 0.127 |
| ν3 CO32− | 1456 | 0.237 | **0.942** | -0.003 | 0.153 |
| ν3 CO32− | 1505 | 0.597 | **0.775** | -0.088 | 0.079 |
| Phosphate | 1089 | -0.174 | -0.049 | **0.893** | -0.077 |
| ν4PO43- | 560 | -0.521 | -0.149 | **-0.769** | 0.183 |
| ν4PO43- | 599 | -0.060 | 0.220 | -0.173 | **0.942** |

aBold type= loadins>0.7 and <-0.7. bRed = loadings from 0.3 to 0.69 and -0.3 to -0.7.


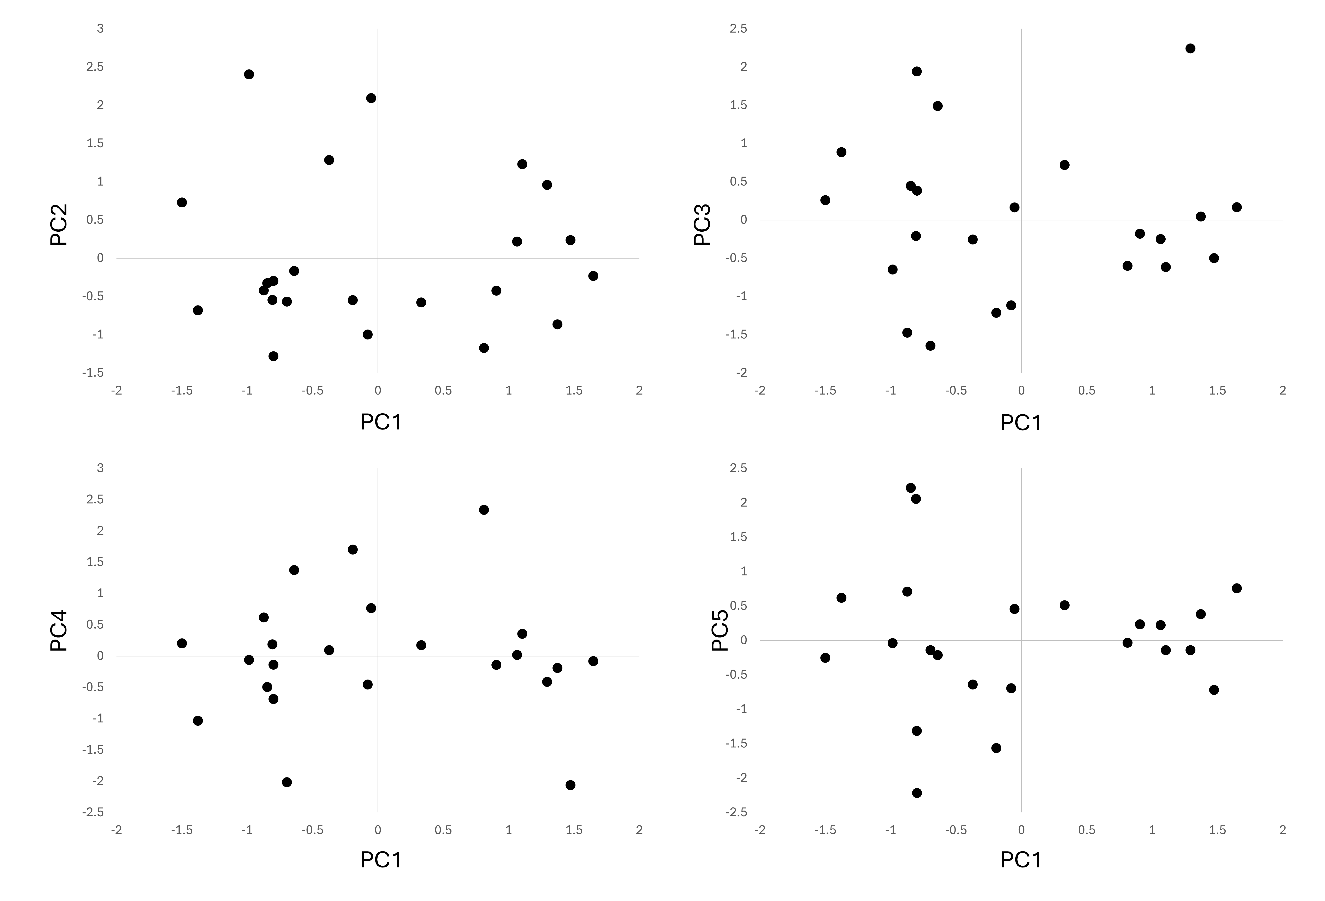


**Supplementary fig 5** Scores for the 5 PCs extracted in the PCA of *non-calcined* group of samples

**Supplementary table 6** Loadings for the selected bands for the PCA of the *calcined* group

| **Band assignation** | **WN (cm-1)** | **PC1** | **PC2** | **PC3** | **PC4** | **PC5** |
| --- | --- | --- | --- | --- | --- | --- |
| ν3PO43- | 1023 | a**0.824** | -0.080 | 0.210 | -0.064 | -0.125 |
| ν4PO43- | 560 | **0.619** | -0.016 | b0.593 | -0.093 | -0.047 |
| ν2 CO32− | 873 | **-0.77** | 0.435 | -0.304 | 0.228 | 0.165 |
| ν1PO43- | 962 | **-0.929** | -0.144 | -0.008 | -0.023 | -0.177 |
| ν3CO32− | 1456 | -0.027 | **0.967** | 0.138 | -0.037 | -0.077 |
| ν3 CO32− | 1411 | -0.001 | **0.959** | 0.083 | 0.032 | -0.165 |
| ν4PO43- | 599 | 0.057 | 0.141 | **0.855** | 0.059 | -0.105 |
| OH(Hap) | 3572 | 0.244 | -0.406 | **0.702** | 0.087 | 0.326 |
| Cyanamide | 699 | -0.147 | -0.396 | **-0.819** | -0.242 | 0.101 |
| OH(Hap) | 630 | -0.022 | -0.363 | 0.359 | **0.806** | 0.108 |
| Cyanamide | 2012 | 0.125 | -0.247 | -0.017 | **-0.876** | -0.123 |
| Phosphate | 1087 | 0.039 | -0.199 | -0.211 | 0.427 | **0.745** |
| Amide II | 1560 | 0.613 | 0.175 | -0.218 | 0.089 | **-0.623** |

aBold type= loadins>0.7 and <-0.7. bRed = loadings from 0.3 to 0.69 and -0.3 to -0.7.


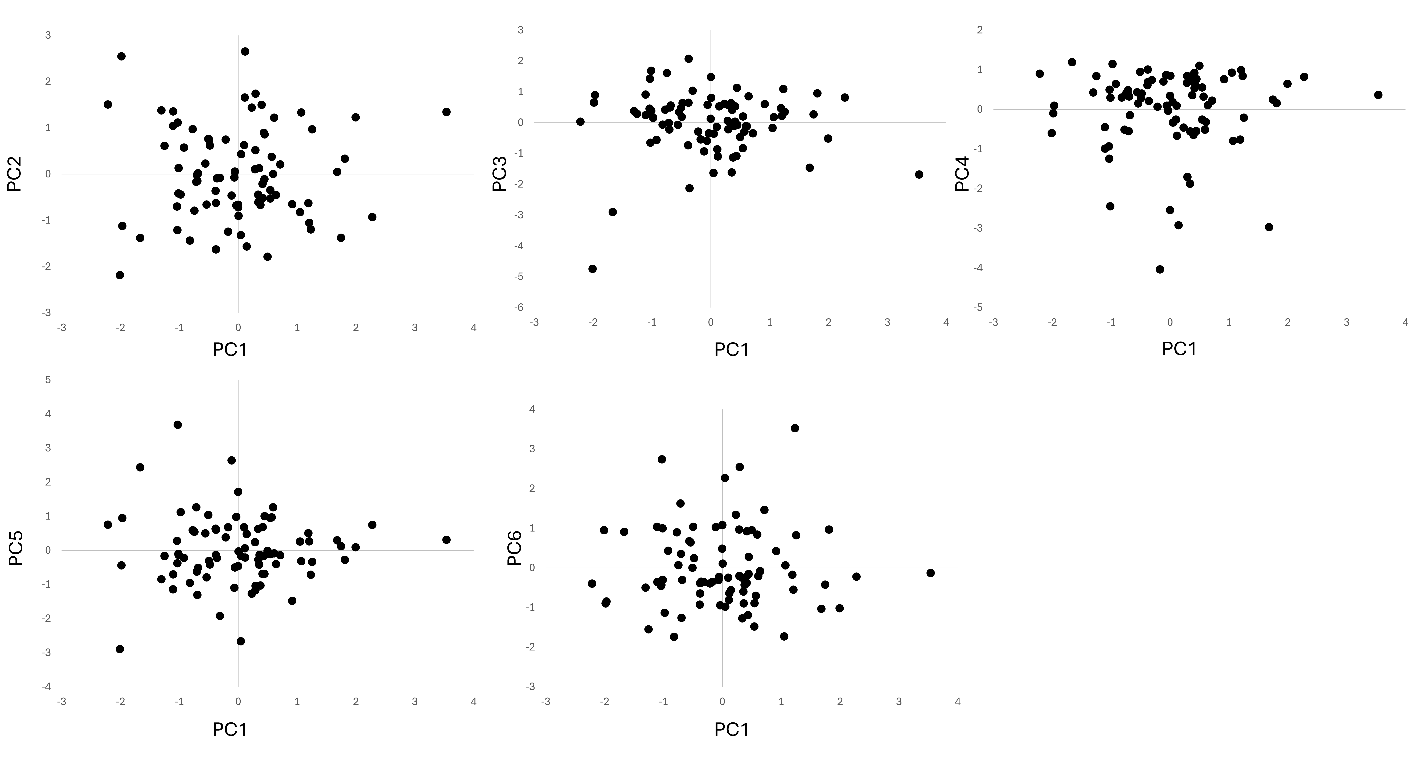


**Supplementary fig 6** Scores for the 6 PCs extracted in the PCA of the *calcined* group of samples


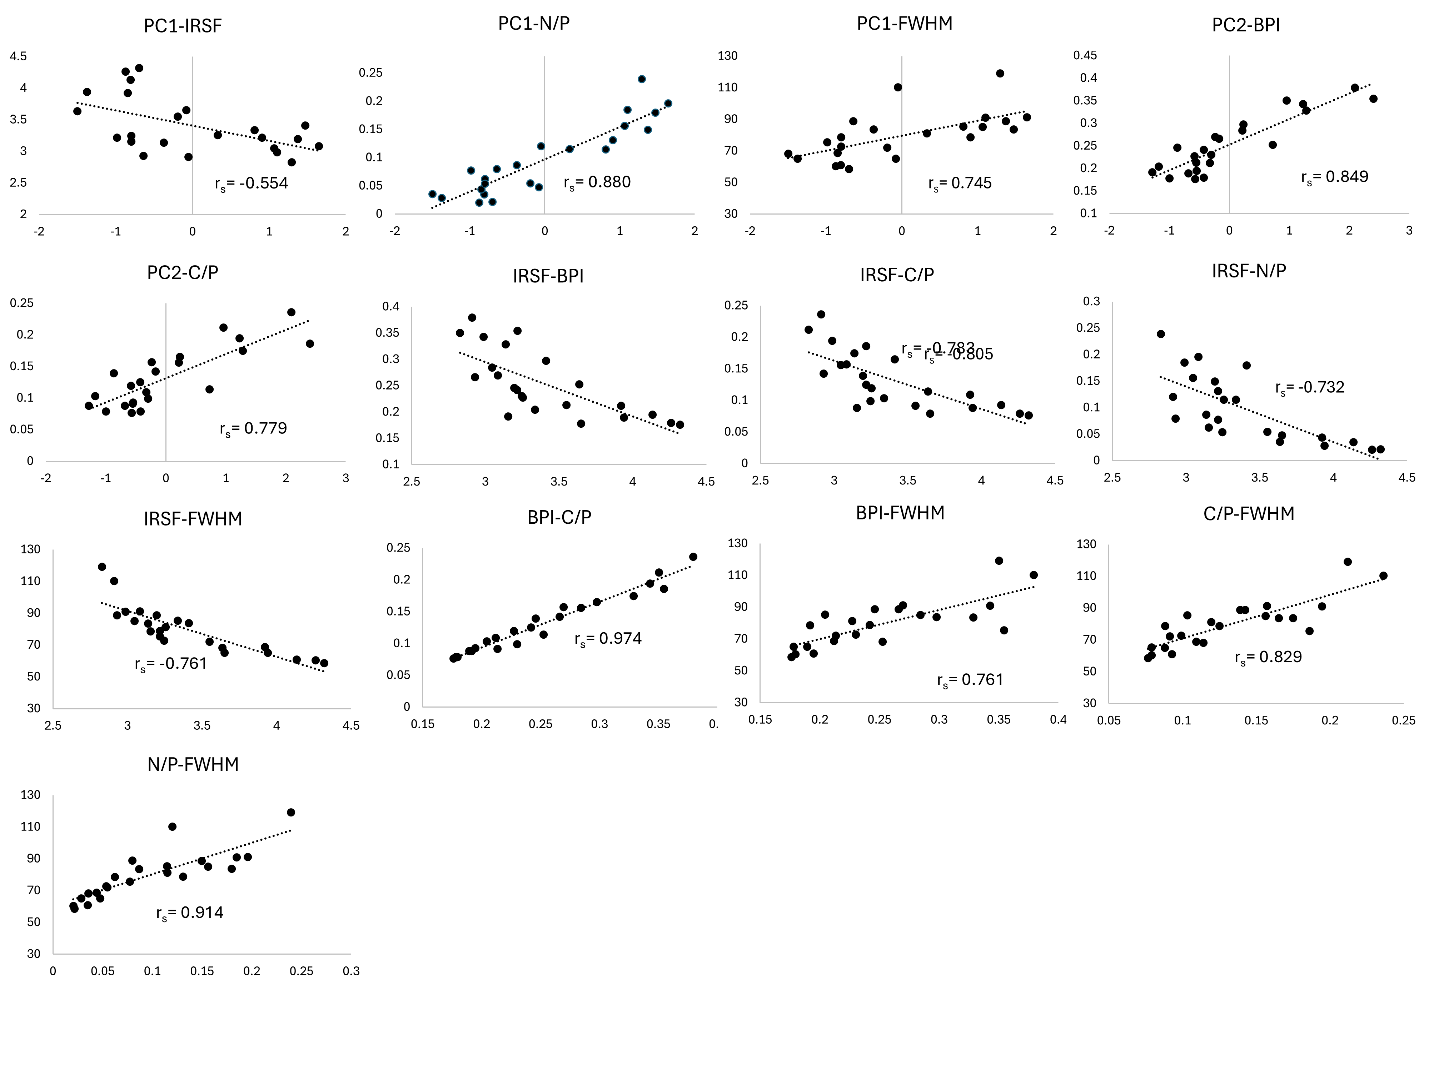
**Supplementary fig 7** Correlation between MIR-indices and PCs for *non-calcined* samples


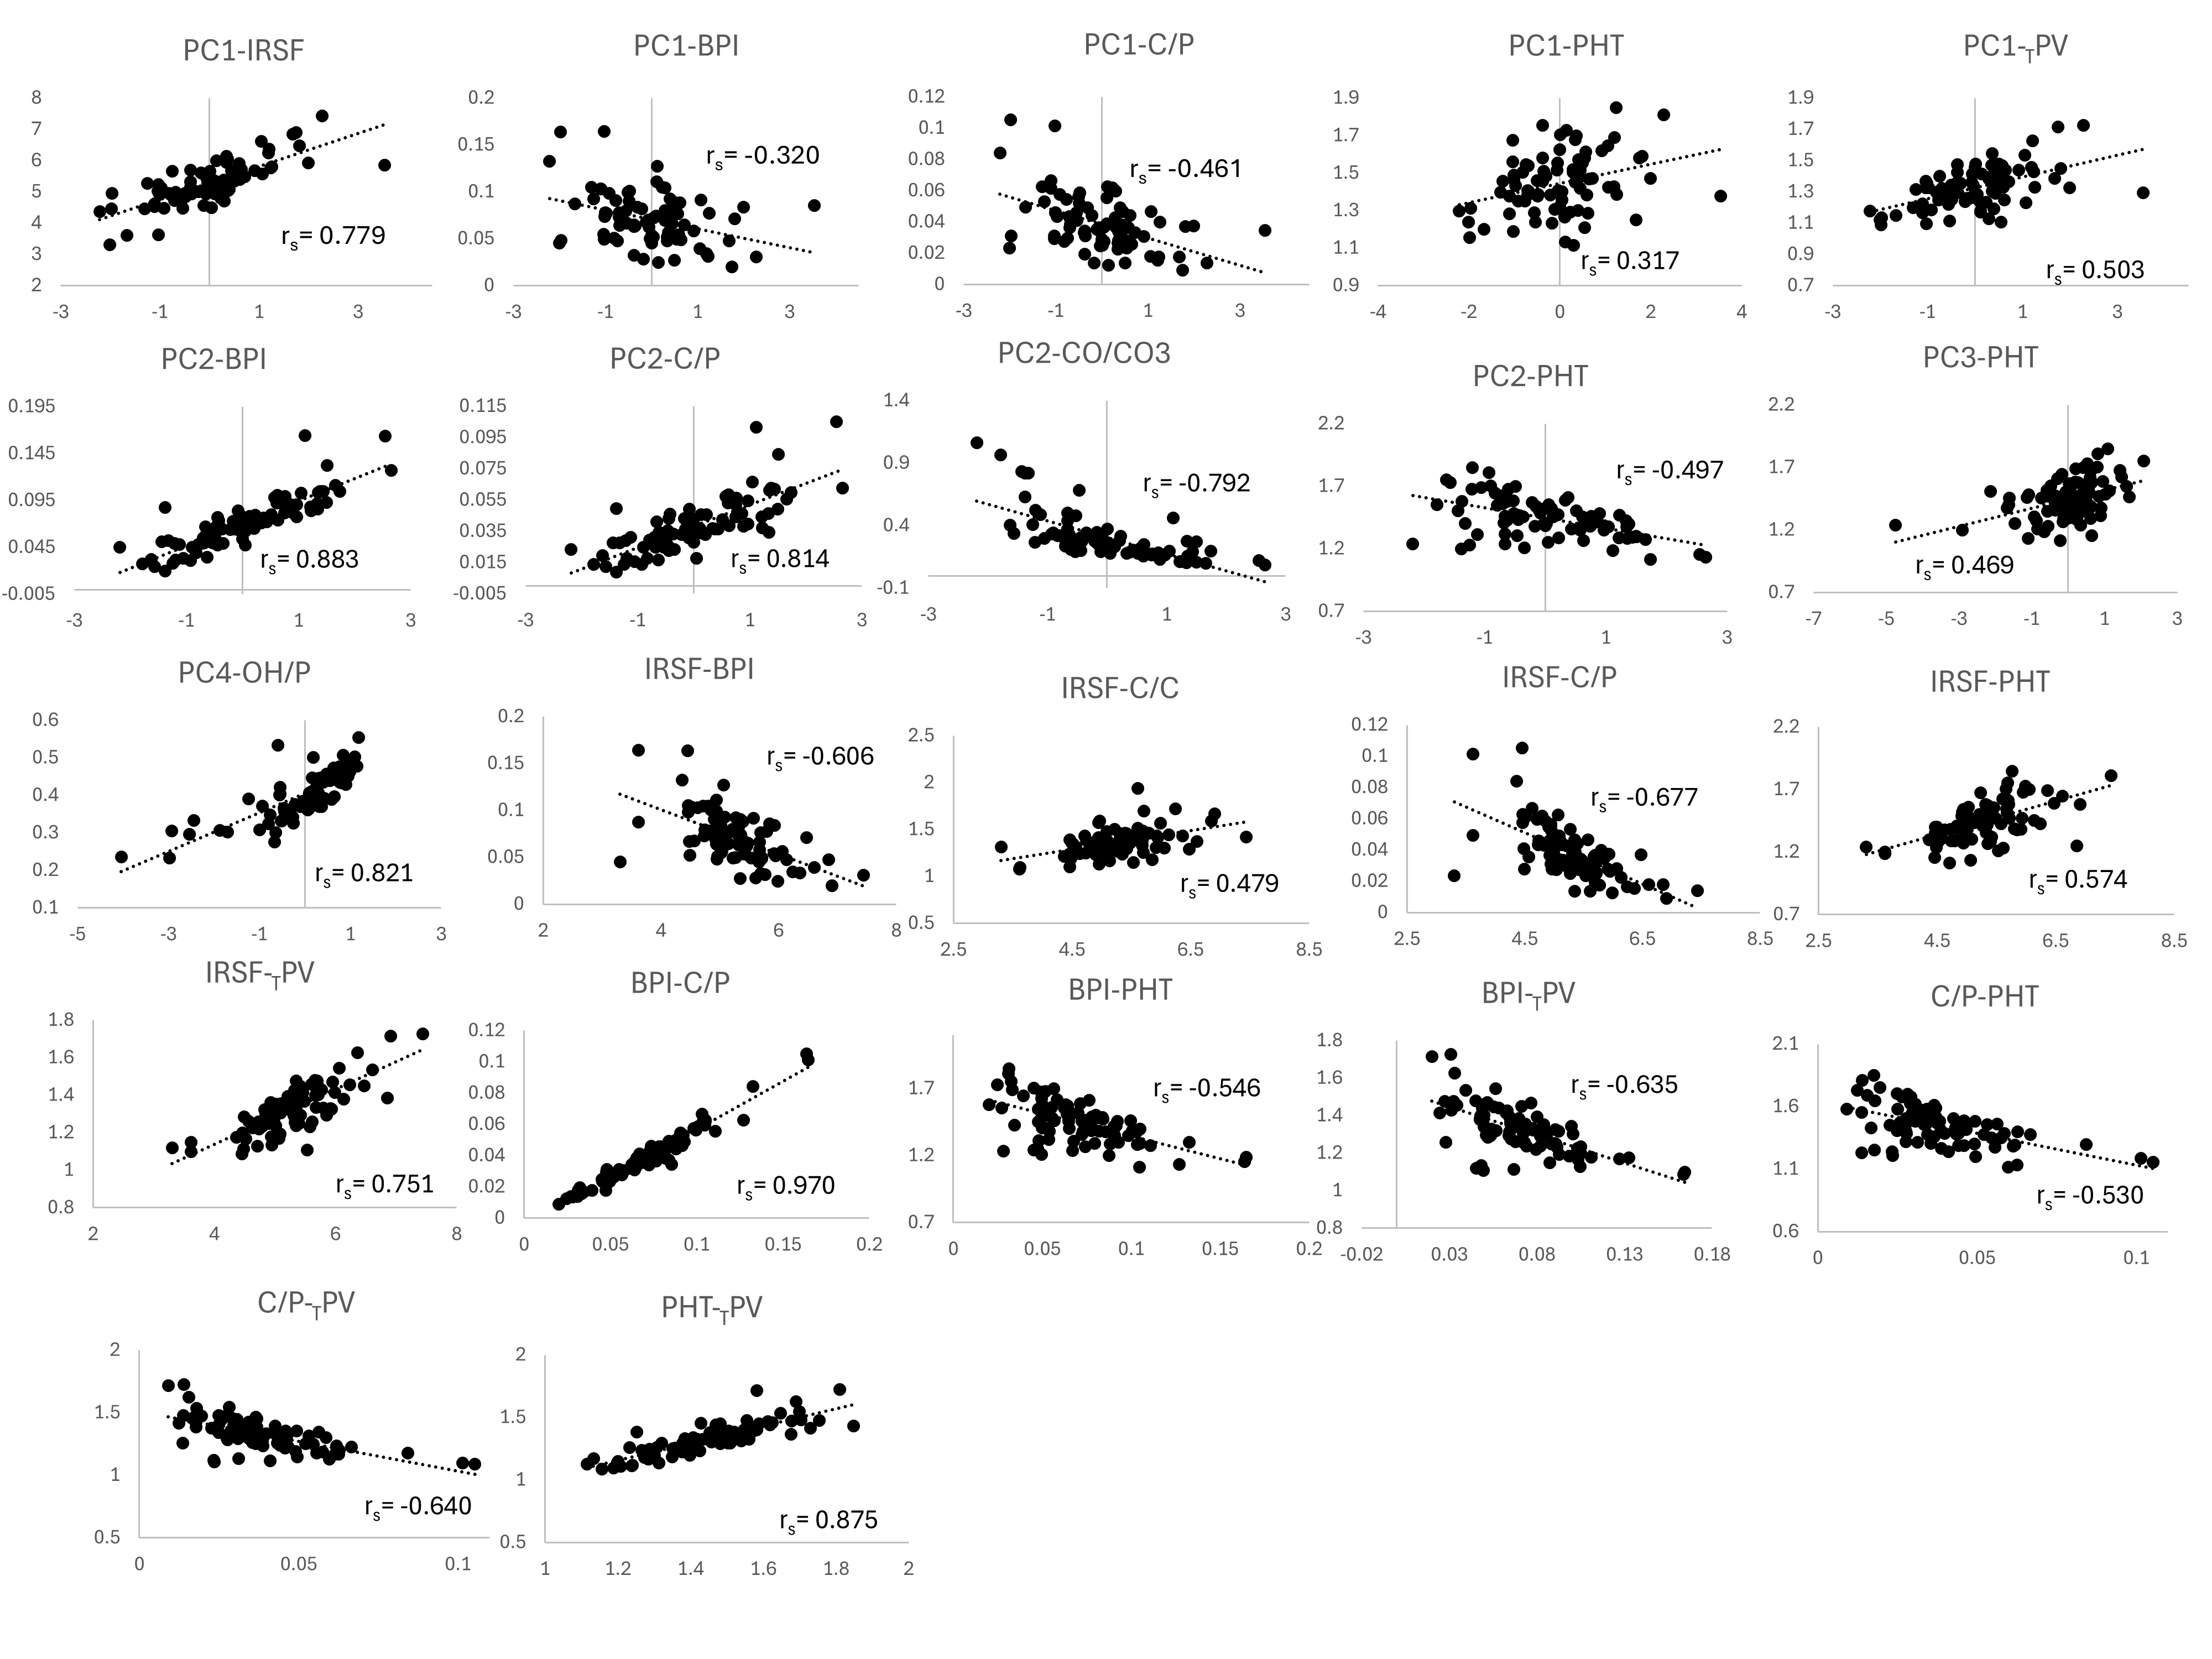


**Supplementary figure 8.** Correlation between MIR-indices and PCs for *calcined* samples.
